# Supplementary material for: Dexmedetomidine versus standard care sedation with propofol or midazolam in intensive care: an economic evaluation
Source: PubMed Central journal article supplement (PMC4391080; doi:10.1186/s13054-015-0787-y), 2015-02-19
Supplement: 13054_2015_787_MOESM4_ESM.pdf [file 13054_2015_787_MOESM4_ESM.pdf]

**Table S2. Duration of the different ICU periods by mechanical ventilation needs, and duration of post-ICU ward stay.** The data are expressed as mean (standard deviation [SD]) and median (interquartile range [IQR]) number of days (24 hr periods) by treatment group. Time at ward was calculated until discharge or death, up to the end of the follow-up period of 45 days. Possible readmission is not included, missing discharge dates for reasons other than death were imputed to day 45.

|                                   | Mean (SD)       |                      | Median (IQR)        |                      |
|-----------------------------------|-----------------|----------------------|---------------------|----------------------|
|                                   | dexmedetomidine | pooled standard care | dexmedetomidine     | pooled standard care |
| <b>Days in ICU on invasive MV</b> | 6.9 (9.1)       | 8.1 (9.2)            | 3.7<br>(1.9 - 7.8)  | 4.9<br>(2.2 - 9.6)   |
| <b>Days in ICU on NIV</b>         | 1.1 (4.4)       | 0.8 (3.0)            | 0.0<br>(0.0 - 0.0)  | 0.0<br>(0.0 - 0.0)   |
| <b>Days in ICU off MV</b>         | 3.3 (5.7)       | 3.5 (5.5)            | 1.6<br>(0.3 - 3.2)  | 1.8<br>(0.6 - 3.9)   |
| <b>Days at ward</b>               | 11.1 (11.7)     | 10.9 (10.7)          | 8.0<br>(1.0 - 16.3) | 8.2<br>(1.1 - 16.9)  |
|                                   | dexmedetomidine | midazolam            | dexmedetomidine     | midazolam            |
| <b>Days in ICU on invasive MV</b> | 7.7 (9.4)       | 9.0 (9.6)            | 4.0<br>(2.5 - 8.8)  | 6.0<br>(3.1 - 6.0)   |
| <b>Days in ICU on NIV</b>         | 0.6 (3.3)       | 0.7 (3.6)            | 0.0<br>(0.0 - 0.0)  | 0.0<br>(0.0 - 0.0)   |
| <b>Days in ICU off MV</b>         | 3.4 (5.9)       | 3.6 (5.3)            | 1.9<br>(0.3 - 3.3)  | 2.1<br>(1.0 - 3.9)   |
| <b>Days at ward</b>               | 10.7 (12.0)     | 10.4 (10.2)          | 6.8<br>(0.8 - 17.0) | 8.1<br>(1.0 - 16.1)  |
|                                   | dexmedetomidine | propofol             | dexmedetomidine     | propofol             |
| <b>Days in ICU on invasive MV</b> | 6.2 (8.8)       | 7.3 (8.8)            | 2.9<br>(1.6 - 6.8)  | 3.8<br>(1.8 - 9.6)   |
| <b>Days in ICU on NIV</b>         | 1.6 (4.9)       | 0.8 (2.4)            | 0.0<br>(0.0 - 0.0)  | 0.0<br>(0.0 - 0.2)   |
| <b>Days in ICU off MV</b>         | 3.1 (5.5)       | 3.3 (5.6)            | 1.4<br>(0.3 - 3.2)  | 1.1<br>(0.3 - 3.8)   |
| <b>Days at ward</b>               | 11.5 (11.3)     | 11.5 (11.1)          | 9.1<br>(3.0 - 16.3) | 8.9<br>(1.3 - 17.1)  |
