# Supplementary material for: Dexmedetomidine versus standard care sedation with propofol or midazolam in intensive care: an economic evaluation
Source: PubMed Central journal article supplement (PMC4391080; doi:10.1186/s13054-015-0787-y), 2015-02-19
Supplement: 13054_2015_787_MOESM8_ESM.pdf [file 13054_2015_787_MOESM8_ESM.pdf]

**Table S6. Details for TISS-based ICU cost analyses in pooled data (S7a-b).**

Unit cost assumptions of a) €40 (top row) and b) €50 per TISS point (bottom row) were assumed in this analysis.

| Mean (SD)                    |                            | Difference<br>in means,<br>€ | Median (IQR)                 |                            | Difference<br>in medians,<br>€ |
|------------------------------|----------------------------|------------------------------|------------------------------|----------------------------|--------------------------------|
| dexmedetomidine<br>(n = 487) | standard care<br>(n = 489) |                              | dexmedetomidine<br>(n = 487) | standard care<br>(n = 489) |                                |
| 14,713<br>(15,136)           | 16,212<br>(14,454)         | <b>-1,499</b>                | 9,869<br>(6,260 - 17,202)    | 11,317<br>(7,100 - 20,286) | <b>-1,448</b>                  |
| 18,313<br>(18,890)           | 20,239<br>(18,056)         | <b>-1,926</b>                | 12,309<br>(7,796 - 21,478)   | 14,092<br>(8,867- 25,350)  | <b>-1,782</b>                  |
