# Supplementary material for: Dexmedetomidine versus standard care sedation with propofol or midazolam in intensive care: an economic evaluation
Source: PubMed Central journal article supplement (PMC4391080; doi:10.1186/s13054-015-0787-y), 2015-02-19
Supplement: 13054_2015_787_MOESM9_ESM.pdf [file 13054_2015_787_MOESM9_ESM.pdf]

**Table S7. Total ICU cost differences between the study treatment groups in the different sensitivity analyses (S1-S8), based on MIDE X**

| <b>Sensitivity analysis of MIDE X: dexmedetomidine vs. midazolam</b>                                                             | <b>Difference in mean costs, €</b> | <b>Difference in median costs, €</b> |
|----------------------------------------------------------------------------------------------------------------------------------|------------------------------------|--------------------------------------|
| S1. Standard sedative set to cost zero                                                                                           | - 2,467                            | - 3,466                              |
| S2. Dexmedetomidine cost increased to €22 per 200 mcg (€0.11 per 1 mcg)                                                          | - 2,476                            | - 3,557                              |
| S3. Cost of a NIV day (24 hr) decreased to € 1,390                                                                               | - 2,519                            | - 3,557                              |
| S4. Cost of a NIV day (24 hr) increased to €1,850                                                                                | - 2,541                            | - 3,573                              |
| S5. Patients with observed data available from all three time periods (without any censoring or imputations)                     | - 3,900                            | - 3,675                              |
| S6. MIDE X patients of those 18 study centers, from which routine ICU costs were available. N (dexmedetomidine):63; propofol: 58 | - 907                              | - 3,351                              |
| S7a. TISS-based total ICU costs, at unit cost €40 per TISS point                                                                 | - 2,444                            | - 2,364                              |
| S7b. TISS-based total ICU costs, at unit cost of €50 per TISS point                                                              | -3,105                             | -2,972                               |
| S8a. Only declining, direct variable daily costs included, assuming they represent 25% of the total ICU costs                    | -483                               | -704                                 |
| S8b. Only the periodically declining, direct variable costs considered, assuming they represent 50% of the total ICU costs       | -1,167                             | -1,772                               |

NIV= non-invasive ventilation, TISS= Therapeutic Intervention Scoring System

**Table S8. Total ICU cost differences between the study treatment groups in the different sensitivity analyses (S1-S8), based on PRODEX**

| <b>Sensitivity analysis of PRODEX: dexmedetomidine vs. propofol</b>                                                                | <b>Difference in mean costs, €</b> | <b>Difference in median costs, €</b> |
|------------------------------------------------------------------------------------------------------------------------------------|------------------------------------|--------------------------------------|
| S1. Standard sedative set to cost zero                                                                                             | - 606                              | - 1,265                              |
| S2. Dexmedetomidine cost €22 per 200 mcg (€0.11 per 1 mcg)                                                                         | - 668                              | - 1,234                              |
| S3. Cost of a NIV day decreased to €1,390 per 24 hours                                                                             | - 1,022                            | - 1,266                              |
| S4. Cost of a NIV day increased to €1,850 per 24 hours                                                                             | - 1,614                            | - 2,552                              |
| S5. Patients with observed data available from all three time periods (without any censoring or imputations)                       | - 2,486                            | - 1,182                              |
| S6. PRODEX patients of those 18 study centers, from which routine ICU costs were available. N (dexmedetomidine):108; propofol: 110 | - 2,571                            | - 2,207                              |
| S7a. TISS-based total ICU costs, at unit cost of €40 per TISS point                                                                | - 517                              | - 781                                |
| S7b. TISS-based total ICU costs, at unit cost of €50 per TISS point                                                                | -700                               | -1,089                               |
| S8a. Only the declining, direct variable daily costs included, assuming they represent 25% of the total ICU costs                  | -25                                | -660                                 |
| S8b. Only declining, direct variable daily costs included, assuming they represent 50% of the total ICU costs                      | -266                               | -1,550                               |

NIV= non-invasive ventilation, TISS= Therapeutic Intervention Scoring System
